# Supplementary material for: Diversity and Metabolism of Microbial Communities in a Hypersaline Lake along a Geochemical Gradient
Source: MDPI journal article supplement (doi:10.3390/biology11040605), 2022-04-15
Supplement: s1 [file s1]

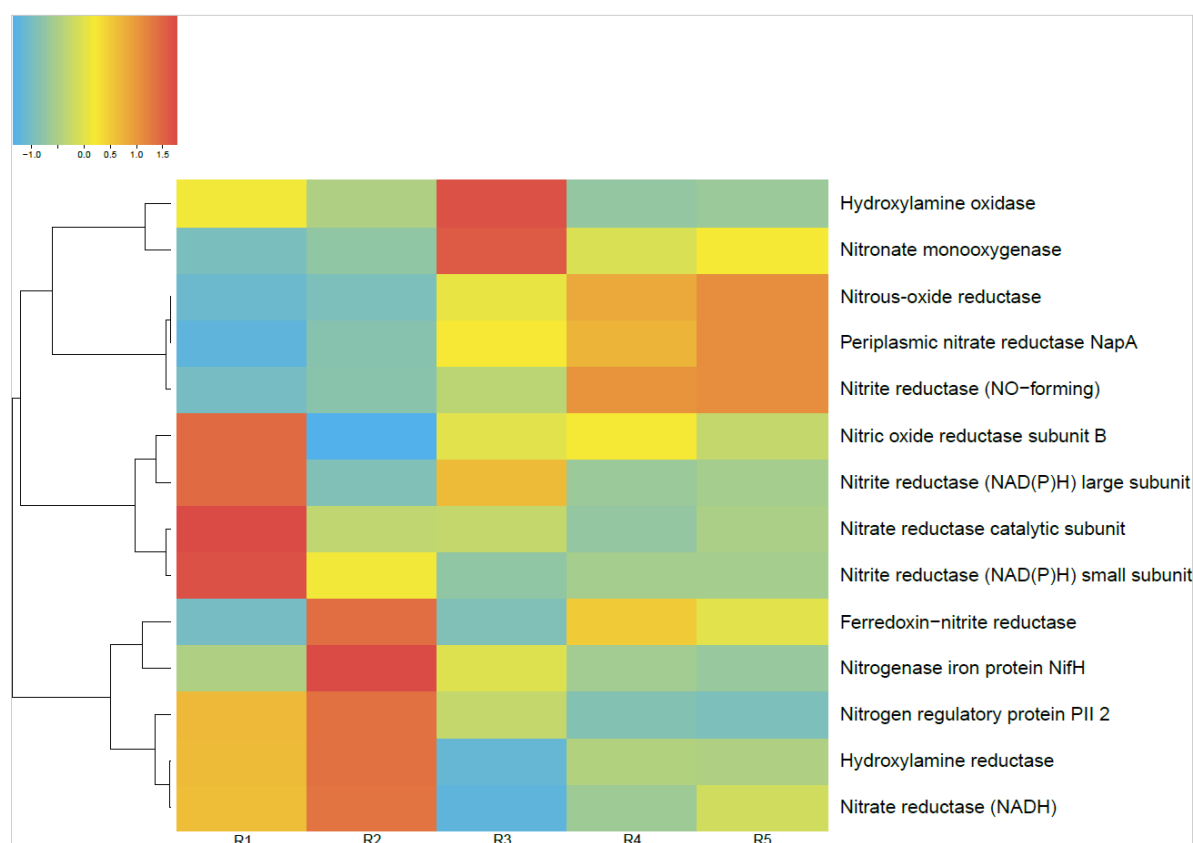

**Figure S1.** Pathways of nitrogen metabolism in the microbial communities of the lake.

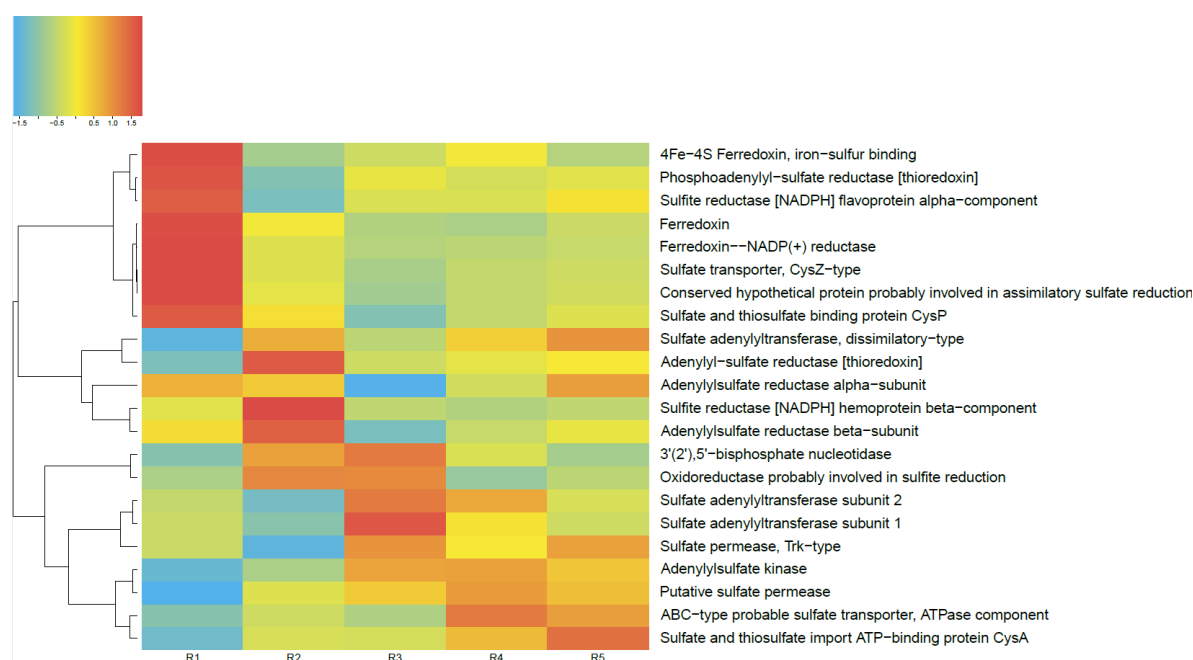

**Figure S2.** Pathways of sulfur metabolism in the microbial communities of the lake.

**Table S1.** The geochemical composition of Lake Solenoe, of the expeller extract from the floating microbial community, and of the pore solutions from bottom sediments.

| Parameter                     | Unit               | Layer |       |       |       |       |
|-------------------------------|--------------------|-------|-------|-------|-------|-------|
|                               |                    | R1    | R2    | R3    | R4    | R5    |
| Ca <sup>2+</sup>              | mg L <sup>-1</sup> | 345   | 530   | 245   | 277   | 228   |
| Mg <sup>2+</sup>              | mg L <sup>-1</sup> | 2070  | 9160  | 3950  | 7910  | 7860  |
| Na <sup>+</sup>               | mg L <sup>-1</sup> | 8850  | 39300 | 28200 | 26400 | 25600 |
| K <sup>+</sup>                | mg L <sup>-1</sup> | 180   | 270   | 226   | 78    | 67    |
| HCO <sup>3-</sup>             | mg L <sup>-1</sup> | 6110  | 4890  | 2660  | 691   | 539   |
| DOC                           | mg L <sup>-1</sup> | 170   | 532   | 175   | 145   | 134   |
| SO <sub>4</sub> <sup>2-</sup> | mg L <sup>-1</sup> | 3700  | 35000 | 20700 | 12900 | 19500 |
| Cl <sup>-</sup>               | mg L <sup>-1</sup> | 14200 | 52600 | 43400 | 53200 | 52300 |
| TDS                           | g L <sup>-1</sup>  | 75    | 142   | 100   | 102   | 106   |
| pH                            | pH                 | 8.21  | 7.02  | 7.35  | 7.10  | 7.29  |
| Eh <sup>1</sup>               | mV                 | 263   | -160  | -172  | -60   | -130  |
| Eh <sup>2</sup>               | mV                 | -     | -180  | -158  | 93    | 187   |
| Li                            | µg L <sup>-1</sup> | 347   | 278   | 223   | 326   | 328   |
| B                             | µg L <sup>-1</sup> | 3650  | 5300  | 1990  | 1460  | 1040  |
| Al                            | µg L <sup>-1</sup> | 1220  | 1190  | 1330  | 373   | 130   |
| Si                            | µg L <sup>-1</sup> | 3700  | 18900 | 18500 | 3080  | <2000 |
| P                             | µg L <sup>-1</sup> | 4560  | 19800 | 35700 | 1360  | <3000 |
| Sc                            | µg L <sup>-1</sup> | 2.54  | 4.00  | 2.42  | 3.21  | 2.70  |
| Ti                            | µg L <sup>-1</sup> | 54    | 77    | 56    | 30    | 21    |
| V                             | µg L <sup>-1</sup> | 174   | 197   | 296   | 153   | 155   |
| Cr                            | µg L <sup>-1</sup> | 64    | 99    | 53    | 66    | 70    |
| Mn                            | µg L <sup>-1</sup> | 4500  | 21100 | 8120  | 4100  | 2700  |
| Fe                            | µg L <sup>-1</sup> | 2400  | 22900 | 623   | 696   | 105   |
| Co                            | µg L <sup>-1</sup> | 8.1   | 6.4   | 4.4   | 5.5   | 7.4   |
| Ni                            | µg L <sup>-1</sup> | 24    | 108   | 48    | 60    | 137   |
| Cu                            | µg L <sup>-1</sup> | 303   | 243   | 153   | 256   | 240   |
| Zn                            | µg L <sup>-1</sup> | 1860  | 133   | <10   | <48   | <48   |
| Ga                            | µg L <sup>-1</sup> | <1    | 7.5   | 7.5   | <1    | <1    |
| Ge                            | µg L <sup>-1</sup> | 61    | 364   | 119   | 100   | 81    |
| As                            | µg L <sup>-1</sup> | 155   | 239   | 107   | 59    | 9     |
| Se                            | µg L <sup>-1</sup> | <240  | 133   | 73    | 200   | 270   |
| Br                            | mg L <sup>-1</sup> | 124   | 100   | 83    | 107   | 107   |
| Rb                            | µg L <sup>-1</sup> | 26    | 39    | 22    | 13    | 13    |
| Sr                            | µg L <sup>-1</sup> | 14000 | 17100 | 14700 | 13500 | 11600 |
| Y                             | µg L <sup>-1</sup> | 3.17  | 1.2   | 4.3   | 1.1   | 1.8   |
| Zr                            | µg L <sup>-1</sup> | 3     | 12    | 9.9   | 1.7   | 1.9   |
| Nb                            | µg L <sup>-1</sup> | 1     | 2.5   | 1.1   | 0.8   | 0.7   |
| Mo                            | µg L <sup>-1</sup> | 4.9   | 9.7   | 11.1  | 12.7  | 111.3 |
| Cd                            | µg L <sup>-1</sup> | 0.19  | <1    | <1    | 0.38  | 0.50  |
| Sb                            | µg L <sup>-1</sup> | 11.4  | 66    | 32.4  | 6.7   | 10.2  |
| I                             | µg L <sup>-1</sup> | 499   | 171   | 152   | 252   | 135   |
| Ba                            | µg L <sup>-1</sup> | <15   | 30    | <15   | <15   | <15   |
| La                            | µg L <sup>-1</sup> | 3.34  | 0.88  | 1.64  | 0.46  | 0.78  |
| Ce                            | µg L <sup>-1</sup> | 7.91  | 1.90  | 4.62  | 0.82  | 0.84  |
| Pr                            | µg L <sup>-1</sup> | 0.89  | 0.26  | 0.42  | 0.15  | 0.25  |
| Nd                            | µg L <sup>-1</sup> | 3.55  | 0.67  | 1.75  | 0.32  | 0.60  |
| Sm                            | µg L <sup>-1</sup> | 0.53  | 0.31  | 0.37  | bdl   | bdl   |

|    |                    |       |      |        |      |      |
|----|--------------------|-------|------|--------|------|------|
| Eu | µg L <sup>-1</sup> | 0.17  | 0.12 | 0.16   | bdl  | bdl  |
| Gd | µg L <sup>-1</sup> | 0.83  | 0.40 | 0.40   | bdl  | bdl  |
| Tb | µg L <sup>-1</sup> | 0.18  | 0.07 | 0.11   | bdl  | bdl  |
| Dy | µg L <sup>-1</sup> | 0.69  | 0.40 | 0.52   | bdl  | bdl  |
| Ho | µg L <sup>-1</sup> | 0.17  | 0.07 | 0.14   | bdl  | bdl  |
| Er | µg L <sup>-1</sup> | 0.34  | 0.14 | 0.53   | bdl  | bdl  |
| Tm | µg L <sup>-1</sup> | 0.07  | 0.04 | 0.15   | bdl  | bdl  |
| Yb | µg L <sup>-1</sup> | 0.25  | 0.14 | 0.58   | bdl  | bdl  |
| Lu | µg L <sup>-1</sup> | 0.008 | 0.02 | 0.06   | bdl  | bdl  |
| Hf | µg L <sup>-1</sup> | 0.14  | 0.2  | <0.001 | 0.51 | 0.37 |
| Ta | µg L <sup>-1</sup> | 1.38  | 0.6  | 0.22   | 0.82 | 0.75 |
| W  | µg L <sup>-1</sup> | 3.3   | 8.5  | 8.9    | 1.7  | 2.3  |
| Au | µg L <sup>-1</sup> | 4.2   | 6.3  | 2.63   | <2.1 | <2.1 |
| Pb | µg L <sup>-1</sup> | 18    | <10  | <10    | 14   | 14   |
| Th | µg L <sup>-1</sup> | 7.4   | 1.3  | 2.4    | 1.2  | 1.2  |
| U  | µg L <sup>-1</sup> | 13    | 2    | 110    | 53   | 298  |

Note. [Be] < 5 µg L<sup>-1</sup>, [Cs] < 1 µg L<sup>-1</sup>, [Tl] < 1 µg L<sup>-1</sup>. bdl: below detection limit. TDS: total dissolved solids.
